# Supplementary material
Source: PubMed Central journal article supplement (PMC3811778)
Supplement: IAI.00503-13_zii999090298so1.pdf [file IAI.00503-13_zii999090298so1.pdf]

## Supplementary material

**Figure S1.** Alignment of the sequences of *Edwardsiella tarda* Ivy homologues. Dots denote gaps introduced for maximum matching. Numbers in brackets indicate overall sequence identities between CsEBI3 and the compared sequences. The consensus residues are in black; the residues that are  $\geq 75\%$  identical among the aligned sequences are in grey. The three residues that were subjected to mutagenesis analysis are boxed. The GenBank accession numbers of the aligned sequences are as follows: *Edwardsiella ictaluri*, ACR68365.1; *Serratia marcescens*, YP\_007345734.1; *Serratia proteamaculans*, YP\_001479800.1; *Aeromonas hydrophila*, YP\_857437.1; *Yersinia pestis*, WP\_002227858; *Yersinia pseudotuberculosis*, YP\_001873342.1; *Yersinia enterocolitica*, YP\_006007815.1; *Burkholderia pseudomallei*, YP\_002895840.1; *Escherichia coli*, BAL37520.1.

|                                            |                                                 |    |
|--------------------------------------------|-------------------------------------------------|----|
| <i>Edwardsiella tarda</i>                  | .....MKTIVGALAALLLAYGAPGMADETIP.....            | 26 |
| <i>Edwardsiella ictaluri</i> (88.7%)       | .....MKTIVGALAALLLAYGAPGMADEAIP.....            | 26 |
| <i>Serratia marcescens</i> (45.5%)         | ....MTGMHTLRYTLLGALLAVSAGSIAQQV.....            | 27 |
| <i>Serratia proteamaculans</i> (41.6%)     | ....MTGQNALRGAIIFGALLSFSVGGFAQQI.....           | 27 |
| <i>Aeromonas hydrophila</i> (40.8%)        | .....MTRLSRALALSLLLVCAAFAFAAA.....              | 24 |
| <i>Yersinia pestis</i> (37.8%)             | .....MSISSGSFAQFA...AVVSSPGVTVP.E               | 24 |
| <i>Yersinia pseudotuberculosis</i> (35.5%) | ....MKGQKNLHCLLAGILLSISSGSFAQFA...AVVSSPGVTVP.E | 39 |
| <i>Yersinia enterocolitica</i> (34.8%)     | ....MKGHKLHCLVTATILSASSWVFAQFATNVALVSASSTPASSA  | 43 |
| <i>Burkholderia pseudomallei</i> (30.4%)   | MIRSFPPSSIRRAVLAATIAGIAGAAVADEFA.....           | 33 |
| <i>Escherichia coli</i> (25.2%)            | MGRISSGMMFEKAITTVAALVIATSAQAQDD.....            | 31 |

|                                    |                                                  |    |
|------------------------------------|--------------------------------------------------|----|
| <i>Edwardsiella tarda</i>          | .....PSLSEIQAQPSYQQSWKQALQGEKDLPSWVRSQGQTS       | 63 |
| <i>Edwardsiella ictaluri</i>       | .....PSLSEIQAQPSYQQSWKQALQGEKDLPSWVRSQGQTS       | 63 |
| <i>Serratia marcescens</i>         | .....VTADLVQQPGYQSSWQCMVKGQCARLPGWARKGSGTS       | 64 |
| <i>Serratia proteamaculans</i>     | .....VTTSDVIQQPGYQSSWQCMVKGQCARLPGWARKGSGTS      | 64 |
| <i>Aeromonas hydrophila</i>        | .....TYTSDLLLSADFKAFWAKATQGIKNIKPKWVRSNGTS       | 61 |
| <i>Yersinia pestis</i>             | PVAST.....PTMAELLQQPVYKARWQKMKVKGQKNLEAWARKGAGTS | 66 |
| <i>Yersinia pseudotuberculosis</i> | PVAST.....PTMAELLQQPVYKARWQKMKVKGQKNLEAWARKGAGTS | 81 |
| <i>Yersinia enterocolitica</i>     | PVQPTLAKPLPTADLLQQPVYKNSWQKMKVKSQKNLEAWARKGAGTS  | 90 |
| <i>Burkholderia pseudomallei</i>   | .....PTFSEAIQAQSAHRAEWFKRMISSERRVPGWLKSDNRVS     | 70 |
| <i>Escherichia coli</i>            | .....LTISSIAKGETTKAAFNQMVQG.HKLEAWVMKG.GTY       | 66 |

W

|                                    |                                                  |     |
|------------------------------------|--------------------------------------------------|-----|
| <i>Edwardsiella tarda</i>          | AEPQTLTWQKAYQVGMVQCPHNCGNRQLFIAFSADRR...QAWALR   | 107 |
| <i>Edwardsiella ictaluri</i>       | TEPQTLTWQDKAYQVGMICQCPHNCGNRQVFIAFSGDRR...QAWALR | 107 |
| <i>Serratia marcescens</i>         | TEAETVSWQGGQYQVGNICKPHDCGNFLIVAFKADKS...QAWGVR   | 108 |
| <i>Serratia proteamaculans</i>     | TEAQSLSWKGNLVLGNICKPHDCANNFMMVAFKEDKS...QAWAVR   | 108 |
| <i>Aeromonas hydrophila</i>        | SP...LEAVAGTFYQSGSVCKPHDCASHYMQLLEDGKAK...RVWVGL | 103 |
| <i>Yersinia pestis</i>             | GPYENITWGAQQYKVGSIKPHDCSNNFMWVAFSNDKK...HVVGLR   | 110 |
| <i>Yersinia pseudotuberculosis</i> | GPYENITWGAQQYKVGSIKPHDCSNNFMWVAFSNDKK...HVVGLR   | 125 |
| <i>Yersinia enterocolitica</i>     | APYEVINWEGQQYKIGRIKPHDCSNNFMWVAFSRDEKQVWQAWGMR   | 137 |
| <i>Burkholderia pseudomallei</i>   | SEYRREQVEGASYLVGWCKPHDCANQFYGVIDEEDSH...RMWGML   | 114 |
| <i>Escherichia coli</i>            | TEAQTVTLLGDETYQVMSACKPHDCGSQRIAMWSEKSN...QMTGLF  | 110 |

C H

|                                    |                                                  |     |
|------------------------------------|--------------------------------------------------|-----|
| <i>Edwardsiella tarda</i>          | VTLPDSLAAMLQFAKYARFQWLGNEFASLKAALMQQVTSQED...WK  | 151 |
| <i>Edwardsiella ictaluri</i>       | VTLPDSLAAMLHPSKHVHFQWLGNEFASLKTLLMKQVTSQEG...WK  | 151 |
| <i>Serratia marcescens</i>         | VEVEDRPEAVAHPPKYYAKYQWLGKFDNSNMQALRQQFENSED...WQ | 152 |
| <i>Serratia proteamaculans</i>     | VEVANKPEAIDHPKYYAKYQWLGKFNDEMKAALKQQFENNED...WK  | 152 |
| <i>Aeromonas hydrophila</i>        | IDLPDSLAARETPSKFARYTWLGQPDKGMCAALMKQVEADEN...WQ  | 147 |
| <i>Yersinia pestis</i>             | VTVADKPEALDNPSKFATYQWLGRENENIQAMTAQLEKDEN...WR   | 154 |
| <i>Yersinia pseudotuberculosis</i> | VTVADKPEALDNPSKFATYQWLGRENENIQAMTAQLEKDEN...WR   | 169 |
| <i>Yersinia enterocolitica</i>     | VSVDDKPEALDAPSKFATYQWLGRESESVQALKKQLEQDEN...WH   | 181 |
| <i>Burkholderia pseudomallei</i>   | VTLPQTPGAYCAPSKYASFRWFGKPEDERMKTYLQDQLKQDEN...WK | 158 |
| <i>Escherichia coli</i>            | STIDEKTSQEKLTWLNVDALSIDGKTVLFAATGSGLENHEDGFNEK   | 157 |

**Figure S2.** SDS-PAGE analysis of rIvy and its mutants. Purified rIvy, rIvyW55A, rIvyC82S, and rIvyH85D (lanes 2 to 5 respectively) were analyzed by SDS-PAGE and viewed after staining with Coomassie blue. Lane 1, protein markers.

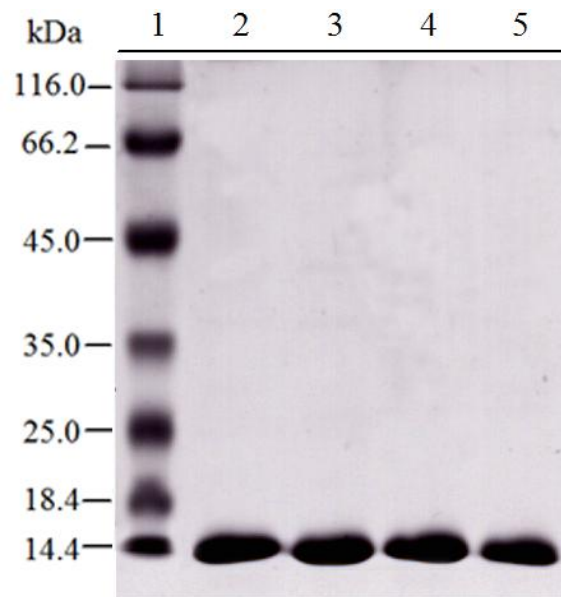

**Table S1.** Data of one representative experimental repeat of Figure 6.

|                          |         | Blood (CFU/ml) |          |             |                |
|--------------------------|---------|----------------|----------|-------------|----------------|
|                          |         | TX01           | TXivy    | TXivy+rIvy  | TXivy+rIvyC82S |
| <b>Fish 1</b>            | plate 1 | 7670           | 680      | 5880        | 1220           |
|                          | plate 2 | 6430           | 480      | 7120        | 1890           |
|                          | plate 3 | 5630           | 920      | 7600        | 900            |
|                          | Mean    | 6576.667       | 693.3333 | 6866.666667 | 1336.666667    |
| <b>Fish 2</b>            | plate 1 | 2770           | 390      | 6340        | 2990           |
|                          | plate 2 | 3760           | 110      | 3210        | 4210           |
|                          | plate 3 | 4170           | 540      | 6740        | 400            |
|                          | Mean    | 3566.667       | 346.6667 | 5430        | 2533.333333    |
| <b>Fish 3</b>            | plate 1 | 3830           | 890      | 3210        | 1320           |
|                          | plate 2 | 5110           | 1470     | 2070        | 890            |
|                          | plate 3 | 3430           | 1350     | 1190        | 1150           |
|                          | Mean    | 4123.333       | 1236.667 | 2156.666667 | 1120           |
| <b>Fish 4</b>            | plate 1 | 780            | 750      | 11200       | 230            |
|                          | plate 2 | 1220           | 620      | 8810        | 100            |
|                          | plate 3 | 1790           | 1050     | 10600       | 250            |
|                          | Mean    | 1263.333       | 806.6667 | 10203.33333 | 193.3333333    |
| <b>Fish 5</b>            | plate 1 | 12300          | 670      | 6570        | 540            |
|                          | plate 2 | 10800          | 350      | 8200        | 280            |
|                          | plate 3 | 9810           | 690      | 8740        | 150            |
|                          | Mean    | 10970          | 570      | 7836.666667 | 323.3333333    |
| <b>Mean of five fish</b> |         | 5300           | 730.6667 | 6498.666667 | 1101.333333    |

|               |         | Kidney (CFU/g) |          |             |                |
|---------------|---------|----------------|----------|-------------|----------------|
|               |         | TX01           | TXivy    | TXivy+rIvy  | TXivy+rIvyC82S |
| <b>Fish 1</b> | plate 1 | 24439.66       | 7826.087 | 21864.95177 | 9142.857143    |
|               | plate 2 | 21077.59       | 5296.443 | 23183.27974 | 13500          |
|               | plate 3 | 34482.76       | 7391.304 | 25401.92926 | 8142.857143    |
|               | Mean    | 26666.67       | 6837.945 | 23483.38692 | 10261.90476    |
| <b>Fish 2</b> | plate 1 | 15411.26       | 12403.43 | 31448.76325 | 4885.496183    |
|               | plate 2 | 20216.45       | 5751.073 | 15229.68198 | 8435.114504    |

|                          |         |          |          |             |             |
|--------------------------|---------|----------|----------|-------------|-------------|
| <b>Fish 2</b>            | plate 3 | 20519.48 | 8626.609 | 18409.89399 | 3129.770992 |
|                          | Mean    | 18715.73 | 8927.039 | 21696.11307 | 5483.46056  |
| <b>Fish 3</b>            | plate 1 | 20156.25 | 7877.358 | 24782.6087  | 2977.777778 |
|                          | plate 2 | 21927.08 | 5801.887 | 26576.08696 | 2488.888889 |
|                          | plate 3 | 10885.42 | 3396.226 | 54891.30435 | 5822.222222 |
|                          | Mean    | 17656.25 | 5691.824 | 35416.66667 | 3762.962963 |
| <b>Fish 4</b>            | plate 1 | 27966.8  | 7959.184 | 15357.14286 | 6326.530612 |
|                          | plate 2 | 34066.39 | 10255.1  | 17103.1746  | 10728.86297 |
|                          | plate 3 | 35020.75 | 2755.102 | 17936.50794 | 9154.51895  |
|                          | Mean    | 32351.31 | 6989.796 | 16798.9418  | 8736.637512 |
| <b>Fish 5</b>            | plate 1 | 19334.81 | 11551.72 | 48015.87302 | 14662.37942 |
|                          | plate 2 | 15232.82 | 6250     | 35317.46032 | 19967.84566 |
|                          | plate 3 | 30177.38 | 13965.52 | 38809.52381 | 20257.23473 |
|                          | Mean    | 21581.67 | 10589.08 | 40714.28571 | 18295.81994 |
| <b>Mean of five fish</b> |         | 23394.33 | 7807.137 | 27621.87884 | 9308.157147 |

### Liver (CFU/g)

|               |         | <b>TX01</b> | <b>TXivy</b> | <b>TXivy+rIvy</b> | <b>TXivy+rIvyC82S</b> |
|---------------|---------|-------------|--------------|-------------------|-----------------------|
| <b>Fish 1</b> | plate 1 | 5966.736    | 611.8547     | 8069.105691       | 2300.319489           |
|               | plate 2 | 6569.647    | 898.6616     | 9491.869919       | 2843.450479           |
|               | plate 3 | 9771.31     | 1051.625     | 8048.780488       | 750.798722            |
|               | Mean    | 7435.897    | 854.0472     | 8536.585366       | 1964.85623            |
| <b>Fish 2</b> | plate 1 | 4005.525    | 804.1958     | 5525.81262        | 4107.883817           |
|               | plate 2 | 4917.127    | 472.028      | 3193.116635       | 2116.182573           |
|               | plate 3 | 4033.149    | 734.2657     | 4990.439771       | 3132.780083           |
|               | Mean    | 4318.6      | 670.1632     | 4569.789675       | 3118.948824           |
| <b>Fish 3</b> | plate 1 | 5536.398    | 1482.301     | 4620.253165       | 2675.276753           |
|               | plate 2 | 4904.215    | 929.2035     | 2215.189873       | 1642.066421           |
|               | plate 3 | 5536.398    | 1725.664     | 7468.35443        | 2011.070111           |
|               | Mean    | 5325.67     | 1379.056     | 4767.932489       | 2109.471095           |
| <b>Fish 4</b> | plate 1 | 7973.485    | 1423.895     | 3121.495327       | 1070.28754            |
|               | plate 2 | 4640.152    | 916.5303     | 1495.327103       | 1421.72524            |
|               | plate 3 | 8522.727    | 1423.895     | 2485.981308       | 1102.236422           |
|               | Mean    | 7045.455    | 1254.774     | 2367.601246       | 1198.083067           |

|                          |         |          |          |             |             |
|--------------------------|---------|----------|----------|-------------|-------------|
|                          | plate 1 | 7987.013 | 5214.844 | 12248.62888 | 499.2199688 |
|                          | plate 2 | 10584.42 | 6093.75  | 16819.0128  | 234.0093604 |
|                          | plate 3 | 9069.264 | 1718.75  | 12248.62888 | 265.2106084 |
| <b>Fish 5</b>            | Mean    | 9213.564 | 4342.448 | 13772.09019 | 332.8133125 |
| <b>Mean of five fish</b> |         | 6667.837 | 1700.098 | 6802.799793 | 1744.834506 |

|                          |         | Spleen (CFU/g) |          |             |                |
|--------------------------|---------|----------------|----------|-------------|----------------|
|                          |         | TX01           | TXivy    | TXivy+rIvy  | TXivy+rIvyC82S |
| <b>Fish 1</b>            | plate 1 | 69146.34       | 19565.22 | 95357.14286 | 51780.82192    |
|                          | plate 2 | 52560.98       | 44347.83 | 111071.4286 | 13972.60274    |
|                          | plate 3 | 125365.9       | 9565.217 | 166785.7143 | 30547.94521    |
|                          | Mean    | 82357.72       | 24492.75 | 124404.7619 | 32100.45662    |
| <b>Fish 2</b>            | plate 1 | 103939.4       | 47142.86 | 202058.8235 | 42678.57143    |
|                          | plate 2 | 56666.67       | 15952.38 | 270588.2353 | 30535.71429    |
|                          | plate 3 | 43030.3        | 30714.29 | 164411.7647 | 43214.28571    |
|                          | Mean    | 67878.79       | 31269.84 | 212352.9412 | 38809.52381    |
| <b>Fish 3</b>            | plate 1 | 211250         | 50952.38 | 119423.0769 | 45211.26761    |
|                          | plate 2 | 145312.5       | 42380.95 | 87692.30769 | 56478.87324    |
|                          | plate 3 | 180312.5       | 26984.13 | 148076.9231 | 22112.67606    |
|                          | Mean    | 178958.3       | 40105.82 | 118397.4359 | 41267.60563    |
| <b>Fish 4</b>            | plate 1 | 89807.69       | 26046.51 | 193442.623  | 25769.23077    |
|                          | plate 2 | 100192.3       | 38837.21 | 255737.7049 | 36346.15385    |
|                          | plate 3 | 99423.08       | 23720.93 | 87704.91803 | 27500          |
|                          | Mean    | 96474.36       | 29534.88 | 178961.7486 | 29871.79487    |
| <b>Fish 5</b>            | plate 1 | 249253.7       | 31964.29 | 76666.66667 | 71111.11111    |
|                          | plate 2 | 344776.1       | 46964.29 | 106666.6667 | 49444.44444    |
|                          | plate 3 | 262238.8       | 12857.14 | 89375       | 49166.66667    |
|                          | Mean    | 285422.9       | 30595.24 | 90902.77778 | 56574.07407    |
| <b>Mean of five fish</b> |         | 142218.4       | 31199.71 | 145003.9331 | 39724.691      |
